# Supplementary material for: Modulating the effective ionic radii of trivalent dopants in ceria using a combination of dopants to improve catalytic efficiency for the oxygen evolution reaction
Source: Royal Society of Chemistry journal article supplement (doi:10.1039/d4ra03360d), 2024-01-01
Supplement: d4ra03360d1.pdf [file d4ra03360d1.pdf]

## Modulating the Effective Ionic Radii of Trivalent dopants in Ceria by Combination of Dopants for Improving Catalytic Efficiency towards Water Splitting Reactions

Debarati Das,<sup>1,2</sup> Jyoti Prakash,<sup>2,3</sup> Anisha Bandyopadhyay,<sup>2,4</sup> Annu Balhara,<sup>1,2</sup> U.K. Goutam,<sup>5</sup> Raghunath Acharya,<sup>1,2</sup> Santosh K. Gupta,<sup>1,2,\*</sup> and Kathi Sudarshan<sup>1,2,#</sup>

<sup>1</sup>Radiochemistry Division, Bhabha Atomic Research Centre, Mumbai-400085, India

<sup>2</sup>Homi Bhabha National Institute, Anushaktinagar, Mumbai – 400094, India

<sup>3</sup> Materials Science Group, Bhabha Atomic Research Centre, Mumbai-400085, India

<sup>4</sup>Radiation and Photochemistry Division, Bhabha Atomic Research Centre, Mumbai-400085, India

<sup>5</sup>Technical Physics Division, Bhabha Atomic Research Centre, Mumbai-400085, India

### S1. Rietveld Refinement and Williamson-Hall Analysis:

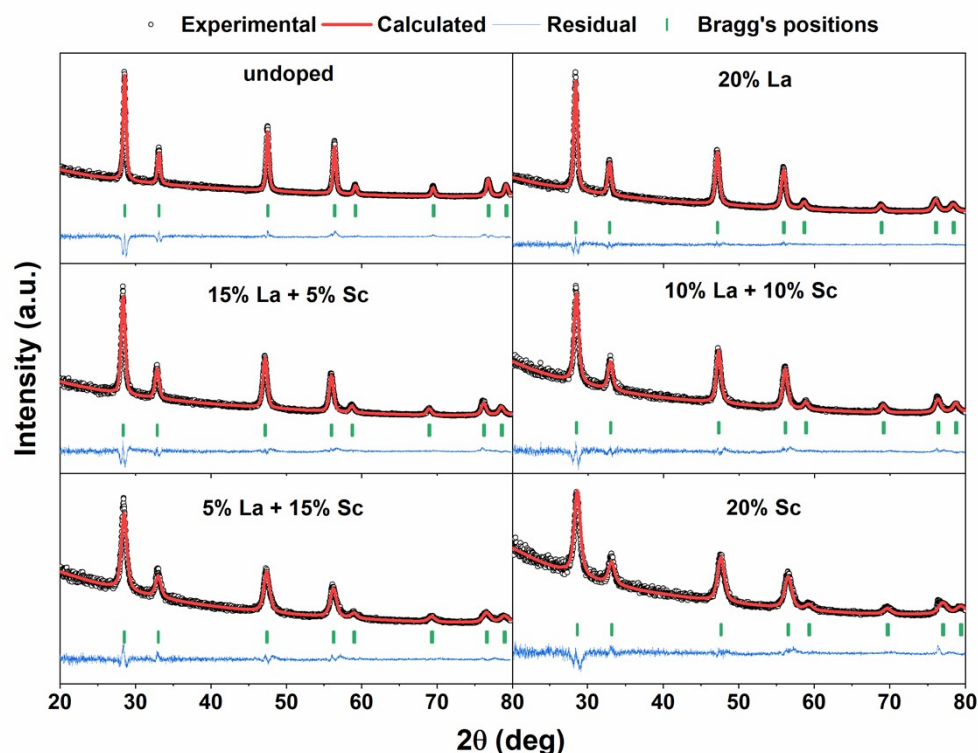

Figure S1: Rietveld refined XRD patterns of the undoped, doped and codoped CeO<sub>2</sub> nano-powders

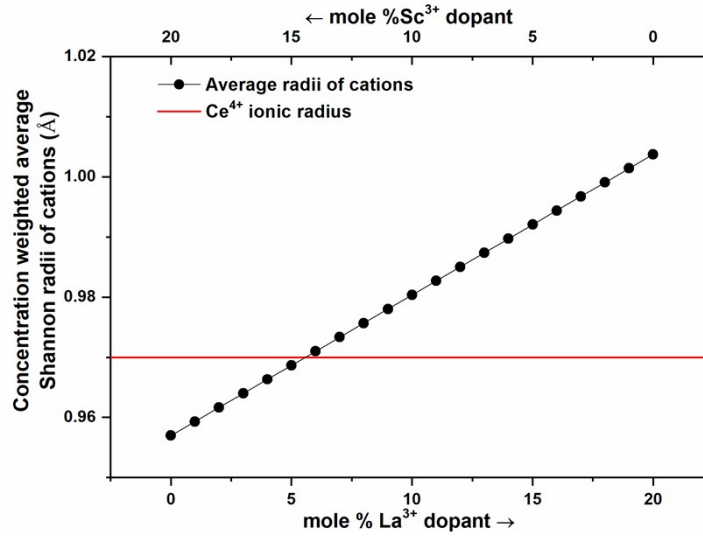

**Figure S2: Concentration weighted Shannon radii of cations in the doped ceria samples.**

### S1.1. Methodology of Williamson-Hall analysis:

In Williamson-Hall approach, based on uniform deformation model, broadening of the X-ray diffraction peak is calculated considering independent contribution from crystallite size and lattice strain using the following equation.

$$\beta_{hkl} \cos \theta_{hkl} = \frac{K\lambda}{D} + 4\varepsilon \sin \theta_{hkl}$$

Where,  $\beta_{hkl}$  is expressed as:  $\sqrt{(\beta_{sample}^2 - \beta_{instr}^2)}$ , the instrumental broadening corrected FWHM (in radians) of a given XRD peak fitted using a gaussian profile, K is a constant equal to 0.9, wavelength  $\lambda$  for Cu  $K_{\alpha}$  is 1.5406 Å, D is crystallite size and  $\varepsilon$  is themicro-strain. Instrumental broadening is calculated from the selected peak widths of the XRD pattern of LaB<sub>6</sub> standard. Strain and crystallite size were calculated respectively from the slope and intercept of the linear plot of  $\beta_{hkl} \cos \theta_{hkl}$  vs,  $4 \sin \theta_{hkl}$ .

**Table S1: Rietveld refinement fitting parameters and estimated crystallite size of the undoped, doped and codoped CeO<sub>2</sub> catalysts:**

(Number in the parenthesis denotes the uncertainty in the least significant digit)

| Dopant(s) | Rietveld refined lattice parameter (Å) | Unite cell volume (Å <sup>3</sup> ) | Goodness of Rietveld fitting parameters                                | Crystallite size from WH analysis (nm) |
|-----------|----------------------------------------|-------------------------------------|------------------------------------------------------------------------|----------------------------------------|
| Undoped   | 5.412 (1)                              | 158.49(1)                           | $\chi^2 = 3.39$<br>$R_p = 5.95$<br>$R_{wp} = 8.35$<br>$R_{exp} = 4.54$ | 30                                     |

|                    |          |           |                                                                        |    |
|--------------------|----------|-----------|------------------------------------------------------------------------|----|
| 20% Sc             | 5.397(1) | 157.24(2) | $\chi^2 = 2.04$<br>$R_p = 4.67$<br>$R_{wp} = 6.31$<br>$R_{exp} = 4.42$ | 13 |
| 15% Sc +<br>5% La  | 5.425(1) | 159.70(1) | $\chi^2 = 1.65$<br>$R_p = 4.16$<br>$R_{wp} = 5.45$<br>$R_{exp} = 4.25$ | 19 |
| 10% Sc +<br>10% La | 5.435(1) | 160.58(2) | $\chi^2 = 2.05$<br>$R_p = 4.52$<br>$R_{wp} = 6.11$<br>$R_{exp} = 4.35$ | 16 |
| 5% Sc +<br>15% La  | 5.448(1) | 161.73(2) | $\chi^2 = 2.62$<br>$R_p = 5.29$<br>$R_{wp} = 7.43$<br>$R_{exp} = 4.41$ | 21 |
| 20% La             | 5.455(1) | 162.29(1) | $\chi^2 = 1.43$<br>$R_p = 3.97$<br>$R_{wp} = 5.11$<br>$R_{exp} = 4.28$ | 25 |

## S2. Neutron Activation Analysis and TEM morphological studies:

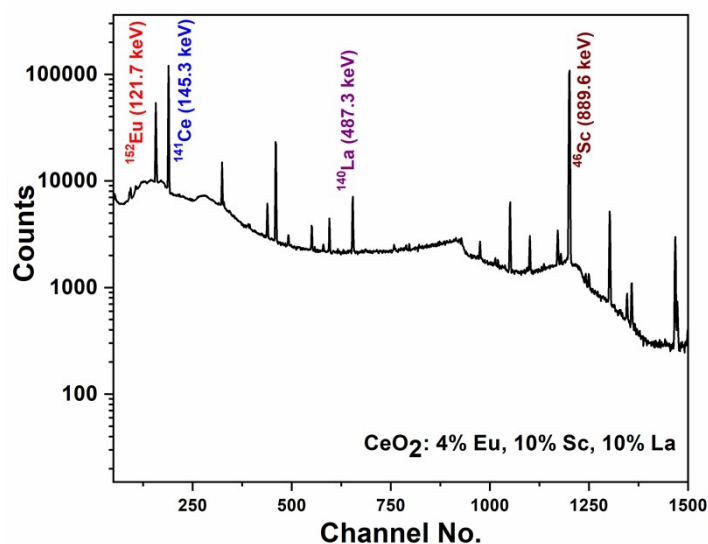

Figure S3: Typical gamma ray spectrum of neutron irradiated Sc, La codoped CeO<sub>2</sub> spiked with 4% Eu.

## S3. Positron Annihilation Lifetime Spectroscopy:

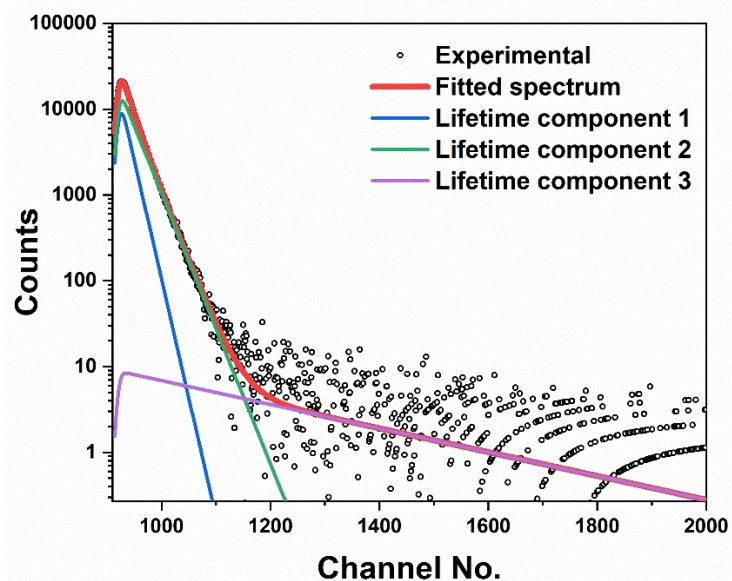

Figure S4: A typical fitted positron lifetime spectrum of 10% Sc + 10% La codoped ceria catalyst

#### S4. X-ray photoelectron spectroscopy:

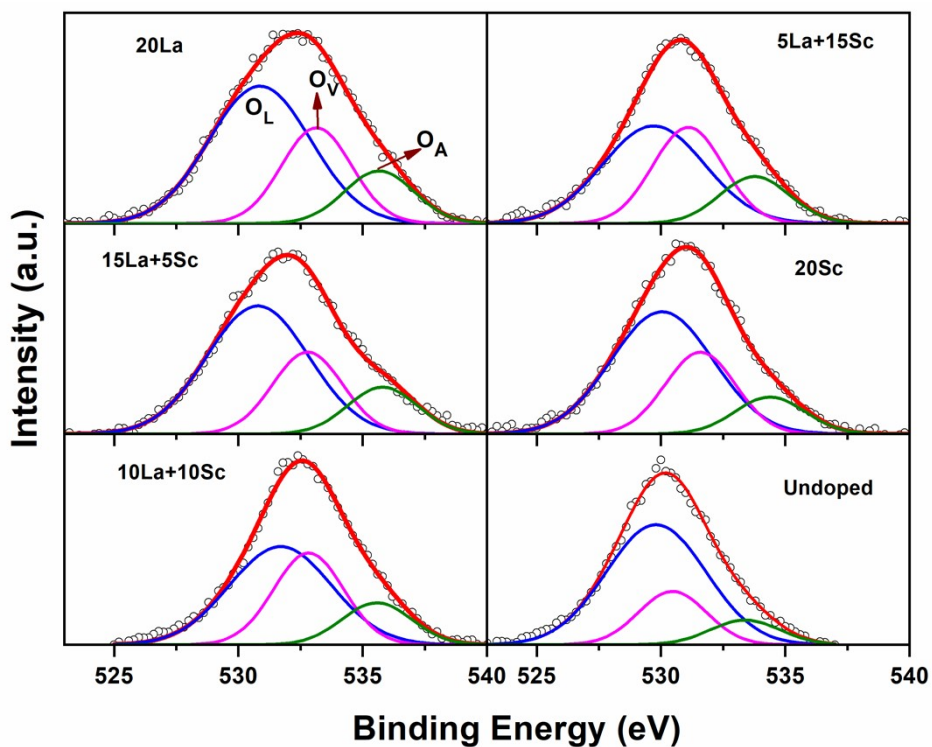

Figure S5: Fitting of O-1s XPS spectra of the ceria catalysts

#### S5. Electrochemical Studies:

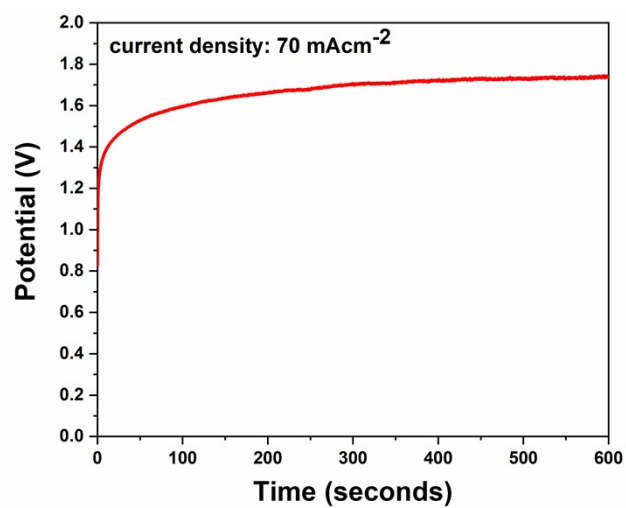

**Figure S6: Chronopotentiometric stability test of the best performing 15% Sc+ 5% La doped catalyst towards OER.**
